# Supplementary material for: Screening drug target combinations in disease-related molecular networks
Source: PubMed Central journal article supplement (PMC6509874; doi:10.1186/s12859-019-2730-8), 2019-05-01
Supplement: 12859_2019_2730_MOESM1_ESM.pdf [file 12859_2019_2730_MOESM1_ESM.pdf]

# The ordinary differential equations of AA metabolic network

December 29, 2018

## Construction of the AA metabolic network model in human PMN

### Method

On the basis of the AA metabolic network, a set of ODEs were constructed to describe cell behavior of inflammation in human PMN (see details in Supplementary information). The ode 45 s routine of Matlab was used to integrate the ODEs. Michaelis-Menten equations (equation (3)) were used to describe enzyme catalytic reactions in the network:

$$\frac{d[S]}{dt} = \frac{K_{cat}[E_t][S]}{K_m + [S]} \quad (1)$$

where  $[S]$  is the concentration of the substrate,  $[E_t]$  is the total concentration of enzyme,  $K_{cat}$  is turnover number, and  $K_m$  is the Michaelis-Menten constant.

If competitive reversible inhibitors are involved in the catalysis, the equation is:

$$\frac{d[S]}{dt} = \frac{K_{cat}[E_t][S]}{K_m(1 + \frac{[I]}{K_i}) + [S]} \quad (2)$$

where  $[I]$  is the concentration of inhibitor and  $K_i$  is the inhibition constant, which is defined as:

$$K_i = \frac{[E][I]}{[EI]} \quad (3)$$

If the inhibitors are irreversible, we assume the enzymes would decay according to the following equation:

$$\frac{d[E]}{dt} = -K[E][I] \quad (4)$$

where  $K$  is a constant.

When activators are involved in the catalysis, we use the following equation:

$$\frac{d[S]}{dt} = \frac{K_{cat}(1 + ([A]/KI))[E_t][S]}{K_m + [S]} \quad (5)$$

where  $[A]$  is the concentration of activator and  $KI$  is a constant.

When up regulation occurred through transcription, we described its effect with the following equation:

$$\frac{d[E]}{dt} = \frac{k[g]^2}{[g]^2 + [k]^2} \quad (6)$$

where  $[g]$  is the concentration of the metabolite up regulating the transcription of the enzyme,  $K$  and  $k$  are constants.

## Equations

The ordinary differential equations (ODEs) of the AA metabolic network was developed. A series of ODEs was established to simulate unicellular behavior, which included 24 initial concentrations and 45 reaction constants (as the following equations). The ODEs for PMNs are:

$$\begin{aligned}
(1) \frac{d[AA]}{dt} &= \frac{K_{cat,PLA2}(1 + \frac{[12-HPETE]}{K_{i12HPETE \rightarrow PLA2}} + \frac{[15-HPETE]}{K_{i15HPETE \rightarrow PLA2}} + \frac{[LTB4]}{K_{LTB4 \rightarrow PLA2}} + \frac{[5-HETE]}{K_{5HETE \rightarrow PLA2}})[PLA2][PL]}{K_{m,PLA2}(1 + \frac{[AA]}{K_i}) + [PL]} \\
&\quad - \frac{K_{cat,15LOX}[15-LOX][AA]}{K_{m,15LOX}(1 + \frac{[15-HPETE]}{K_i}) + [AA]} - \frac{K_{cat,12LOX}[12-LOX][AA]}{K_{m,12LOX}(1 + \frac{[12-HPETE]}{K_{i12HPETE \rightarrow 12LOX}} + \frac{[15-HETE]}{K_{i15HPETE \rightarrow 12LOX}}) + [AA]} \\
&\quad - \frac{K_{cat,5LOX}[5-LOX][AA]}{K_{m,5LOX}(1 + \frac{[5-HPETE]}{K_i} + \frac{[12-HETE]}{K_{i12HETE \rightarrow 5LOX}} + \frac{[15-HETE]}{K_{i15HETE \rightarrow 5LOX}} + \frac{[PGE2]}{K_{iPGE2 \rightarrow 5LOX}} + \frac{[5-HETE]}{K_{i5HETE \rightarrow 5LOX}}) + [AA]} \\
&\quad - \frac{K_{cat,COX2}[COX-2][AA]}{K_{m,COX2}(1 + \frac{[PGH2]}{K_i} + \frac{[PGE2]}{K_{iPGE2 \rightarrow COX2}}) + [AA]} - K_{d_{exoAA}}[exoAA] - K_{d_{AA}}[AA] \\
(2) \frac{d[15-HPETE]}{dt} &= \frac{K_{cat,15-LOX}[15-LOX][AA]}{K_{m,15LOX}(1 + \frac{[15-HPETE]}{K_i}) + [AA]} - \frac{K_{cat,PHGPx}[PHGPx][15-HPETE]}{K_{m,PHGPx}(1 + \frac{[15-HETE]}{K_i}) + [15-HPETE]} - K_{d_{15HPETE}}[15-HPETE] \\
(3) \frac{d[15-HETE]}{dt} &= \frac{K_{cat,PHGPx}[PHGPx][15-HPETE]}{K_{m,PHGPx}(1 + \frac{[15-HETE]}{K_i}) + [15-HPETE]} - K_{d_{15-HETE}}[15-HETE] \\
(4) \frac{d[12-HPETE]}{dt} &= \frac{K_{cat,12-LOX}[12-LOX][AA]}{K_{m,12LOX}(1 + \frac{[12-HPETE]}{K_{i12-HPETE \rightarrow 12-LOX}} + \frac{[15-HETE]}{K_{i15-HPETE \rightarrow 12-LOX}}) + [AA]} - \frac{K_{cat,PHGPx}[PHGPx][12-HPETE]}{K_{m,PHGPx}(1 + \frac{[12-HETE]}{K_i}) + [12-HPETE]} \\
(5) \frac{d[12-HETE]}{dt} &= \frac{K_{cat,PHGPx}[PHGPx][12-HPETE]}{K_{m,PHGPx}(1 + \frac{[12-HETE]}{K_i}) + [12-HPETE]} \\
(6) \frac{d[PGH2]}{dt} &= \frac{K_{cat,COX2}[COX-2][AA]}{K_{m,COX2}(1 + \frac{[PGH2]}{K_i} + \frac{[PGE2]}{K_{iPGE2 \rightarrow COX2}}) + [AA]} - \frac{K_{cat,TXAS}[TXAS][PGH2]}{K_{m,TXAS}(1 + \frac{[TXA2]}{K_i}) + [PGH2]} \\
&\quad - \frac{K_{cat,PGES}[PGES][PGH2]}{K_{m,PGES}(1 + \frac{[PGE2]}{K_i} + \frac{[AA]}{K_{iAA \rightarrow PGES}} + \frac{[15-HETE]}{K_{i15-HETE \rightarrow PGES}}) + [PGH2]} \\
(7) \frac{d[PGE2]}{dt} &= \frac{K_{cat,PGES}[PGES][PGH2]}{K_{m,PGES}(1 + \frac{[PGE2]}{K_i} + \frac{[AA]}{K_{iAA \rightarrow PGES}} + \frac{[15-HETE]}{K_{i15-HETE \rightarrow PGES}}) + [PGH2]} \\
(8) \frac{d[TXA2]}{dt} &= \frac{K_{cat,TXAS}[TXAS][PGH2]}{K_{m,TXAS}(1 + \frac{[TXA2]}{K_i}) + [PGH2]} - K_{d_{TXA2}}[TXA2] \\
(9) \frac{d[TXB2]}{dt} &= K_{d_{TXA2}}[TXA2] - K_{d_{TXB2}}[TXB2] \\
(10) \frac{d[5-HPETE]}{dt} &= \frac{K_{cat,5-LOX}[5-LOX][AA]}{K_{m,5-LOX}(1 + \frac{[5-HPETE]}{K_i} + \frac{[12-HETE]}{K_{i12-HETE \rightarrow 5-LOX}} + \frac{[15-HETE]}{K_{i15-HETE \rightarrow 5-LOX}} + \frac{[PGE2]}{K_{iPGE2 \rightarrow 5LOX}} + \frac{[5-HETE]}{K_{i5-HETE \rightarrow 5-LOX}}) + [AA]} \\
&\quad - \frac{K_{cat,5-LOX}[5-LOX][5-HPETE]}{K_{m,5-LOX}(1 + \frac{[LTA4]}{K_i} + \frac{[12-HETE]}{K_{i12-HETE \rightarrow 5-LOX}} + \frac{[15-HETE]}{K_{i15-HETE \rightarrow 5-LOX}} + \frac{[PGE2]}{K_{iPGE2 \rightarrow 5-LOX}} + \frac{[5-HETE]}{K_{i5-HETE \rightarrow 5-LOX}}) + [5-HPETE]} \\
&\quad - \frac{K_{cat,PHGPx}[PHGPx][5-HPETE]}{K_{m,PHGPx}(1 + \frac{[5-HETE]}{K_i}) + [5-HPETE]}
\end{aligned}$$

$$\begin{aligned}
(11) \quad \frac{d[5 - HETE]}{dt} &= \frac{K_{cat,PHGPx}[PHGPx][5 - HPETE]}{K_{m,PHGPx}(1 + \frac{[5-HETE]}{K_i}) + [5 - HPETE]} - Kd_{5HETE}[5 - HETE] \\
(12) \quad \frac{d[LTA4]}{dt} &= \frac{K_{cat,5LOX}[5 - LOX][5 - HPETE]}{K_{m,5-LOX}(1 + \frac{[LTA4]}{K_i} + \frac{[12-HETE]}{K_{i12-HETE \rightarrow 5-LOX}} + \frac{[15-HETE]}{K_{i15-HETE \rightarrow 5-LOX}} + \frac{[PGE2]}{K_{iPGE2 \rightarrow 5-LOX}} + \frac{[5-HETE]}{K_{i5-HETE \rightarrow 5-LOX}}) + [5 - HPETE]} \\
&\quad - \frac{K_{cat,LTA4H}[LTA4H][LTA4]}{K_{m,LTA4H}(1 + \frac{[LTB4]}{K_i}) + [LTA4]} - Kd_{LTA4}[LTA4] \\
(13) \quad \frac{d[LTB4]}{dt} &= \frac{K_{cat,LTA4H}[LTA4H][LTA4]}{K_{m,LTA4H}(1 + \frac{[LTB4]}{K_i}) + [LTA4]} - Kd_{LTB2}[LTB2] \\
&\quad - \frac{K_{cat,CYP4F3}[CYP4F3][LTB4]}{K_{m,CYP4F3}(1 + \frac{[20-OH-LTB4]}{K_i} + \frac{[12-HETE]}{K_{i12-HETE \rightarrow CYP4F3}} + \frac{[5-HETE]}{K_{i15-HETE \rightarrow CYP4F3}}) + [LTB4]} - Kd_{LTB4}[LTB4] \\
(14) \quad \frac{d[20 - OH - LTB4]}{dt} &= \frac{K_{cat,CYP4F3}[CYP4F3][LTB4]}{K_{m,CYP4F3}(1 + \frac{[20-OH-LTB4]}{K_i} + \frac{[12-HETE]}{K_{i12-HETE \rightarrow CYP4F3}} + \frac{[5-HETE]}{K_{i15-HETE \rightarrow CYP4F3}}) + [LTB4]} \\
(15) \quad \frac{d[PLA2]}{dt} &= 0 \\
(16) \quad \frac{d[15 - LOX]}{dt} &= \frac{k_{PGE2 \rightarrow 15-LOX}[PGE2]^2}{[PGE2]^2 + (K_{PGE2 \rightarrow 15-LOX})^2} - Kd_{15-LOX}[15 - LOX] \\
(17) \quad \frac{d[12 - LOX]}{dt} &= -K_{i15-HPETE \rightarrow 12-LOX}[15 - HPETE][12 - LOX] \\
(18) \quad \frac{d[COX - 2]}{dt} &= 0 \\
(19) \quad \frac{d[PGES]}{dt} &= 0 \\
(20) \quad \frac{d[TXAS]}{dt} &= -(K_{i15-HPETE \rightarrow TXAS}[15 - HPETE] + K_{iPGH2 \rightarrow TXAS}[PGH2])[TXAS] \\
(21) \quad \frac{d[5 - LOX]}{dt} &= (K_{LTB4 \rightarrow 5-LOX}[LTB4] - K_{iLTA4 \rightarrow 5-LOX}[LTA4] - K_{i5-HPETE \rightarrow 5-LOX}[5 - HPETE] \\
&\quad - K_{i15-HPETE \rightarrow 5-LOX}[15 - HPETE])[5 - LOX] \\
(22) \quad \frac{d[LTA4H]}{dt} &= -\frac{K_{cat,LTA4H}[LTA4H][LTA4]}{129(K_{m,LTA4H} + [LTA4])} \\
(23) \quad \frac{d[CYP4F3]}{dt} &= 0 \\
(24) \quad \frac{d[PHGPx]}{dt} &= 0
\end{aligned}$$
