# Supplementary material for: Screening drug target combinations in disease-related molecular networks
Source: PubMed Central journal article supplement (PMC6509874; doi:10.1186/s12859-019-2730-8), 2019-05-01
Supplement: 12859_2019_2730_MOESM2_ESM.pdf [file 12859_2019_2730_MOESM2_ESM.pdf]

# The corresponding parameters of AA metabolic network

December 29, 2018

A total of 23 reaction constants (as shown in additional file 1) was taken from experimental values, while the others were obtained by fitting the calculated production of LTB<sub>4</sub>. In addition, the corresponding parameters are shown in Table 1, 2, 3.

**Table 1.** The corresponding parameter derived from parameter fitting.

| parameter                          | value    |
|------------------------------------|----------|
| $Ki_{AA \rightarrow PGES}$         | 0.3      |
| $Ki_{15-HETE \rightarrow PGES}$    | 0.53     |
| $Ki_{PGE2 \rightarrow COX2}$       | 2.8      |
| $Ki_{15-HPETE \rightarrow TXAS}$   | 0.52     |
| $Ki_{PHG2 \rightarrow TXAS}$       | 0.029    |
| $Ki_{15-HPETE \rightarrow 5-LOX}$  | 0.01     |
| $Ki_{12-HETE \rightarrow 5-LOX}$   | 30       |
| $Ki_{15-HETE \rightarrow 5-LOX}$   | 4        |
| $Ki_{LTA4 \rightarrow 5-LOX}$      | 0.175    |
| $Ki_{5-HPETE \rightarrow 5-LOX}$   | 0.26     |
| $Ki_{PGE2 \rightarrow 5-LOX}$      | 72       |
| $Ki_{5-HETE \rightarrow 5-LOX}$    | 6.3      |
| $Ki_{LTA4 \rightarrow LTA4H}$      | 129      |
| $Ki_{12-HETE \rightarrow CYP4F3}$  | 0.29     |
| $Ki_{5-HETE \rightarrow CYP4F3}$   | 0.8      |
| $Ki_{15-HETE \rightarrow 12-LOX}$  | 1.5      |
| $Ki_{15-HPETE \rightarrow 12-LOX}$ | 0.23     |
| $Ki_{12-HPETE \rightarrow 12-LOX}$ | 1.6      |
| $Ki_{12-HPETE \rightarrow PLA2}$   | 260      |
| $Ki_{15-HPETE \rightarrow PLA2}$   | 430      |
| $Ki_{LTB4 \rightarrow PLA2}$       | 180      |
| $Ki_{5-HETE \rightarrow PLA2}$     | 240      |
| $Ki_{LTB4 \rightarrow 5-LOX}$      | 0.022    |
| $Ki_{PGE2 \rightarrow 15-LOX}$     | 0.15     |
| $Ki_{PGE2 \rightarrow 15-LOX}$     | 0.000023 |
| $Ki$                               | 500      |

**Table 2.** The  $K_m$  and  $K_{cat}$  of enzymes used in the ODEs and the corresponding parameter has no direct value from experiments and is derived from parameter fitting.

| enzyme          | $K_{cat}$ | $K_m$ |
|-----------------|-----------|-------|
| 15 – <i>LOX</i> | 5000      | 13    |
| 5 – <i>LOX</i>  | 6000      | 1.4   |
| <i>LTA4H</i>    | 150       | 20    |
| <i>CYP4F3A</i>  | 150       | 3.9   |
| <i>PHGPx</i>    | 2000      | 58    |
| <i>COX – 2</i>  | 1000      | 33    |
| <i>PGES</i>     | 3000      | 160   |
| <i>TXAS</i>     | 1599      | 4     |
| <i>PLA2</i>     | 3600      | 2600  |
| 12 – <i>LOX</i> | 9500      | 160   |

**Table 3.** The decay rate of molecules used in ODEs and the corresponding parameter has no direct value from experiments and is derived from parameter fitting.

| parameter       | value   |
|-----------------|---------|
| $Kd_{15-HPETE}$ | 0.36    |
| $Kd_{15-HETE}$  | 1       |
| $Kd_{TXA}$      | 0.0001  |
| $Kd_{TXB}$      | 0.0013  |
| $Kd_{5-HETE}$   | 0.00042 |
| $Kd_{LTA4}$     | 0.0017  |
| $Kd_{LTB4}$     | 0.00063 |
| $Kd_{15-LOX}$   | 0.00083 |
| $Kd_{exoAA}$    | 0.017   |
| $Kd_{AA}$       | 0.14    |
